# Supplementary figures and images for: Deleterious Genetic Variation Across the NOD Signaling Pathway Is Associated With Reduced NFKB Signaling Transcription and Upregulation of Alternative Inflammatory Transcripts in Pediatric Inflammatory Bowel Disease
Source: PubMed Central journal article supplement — Inflamm Bowel Dis. 2022 Jan 3;28(6):912–22. doi: 10.1093/ibd/izab318 (PMC9165556; doi:10.1093/ibd/izab318), 2022-01-03

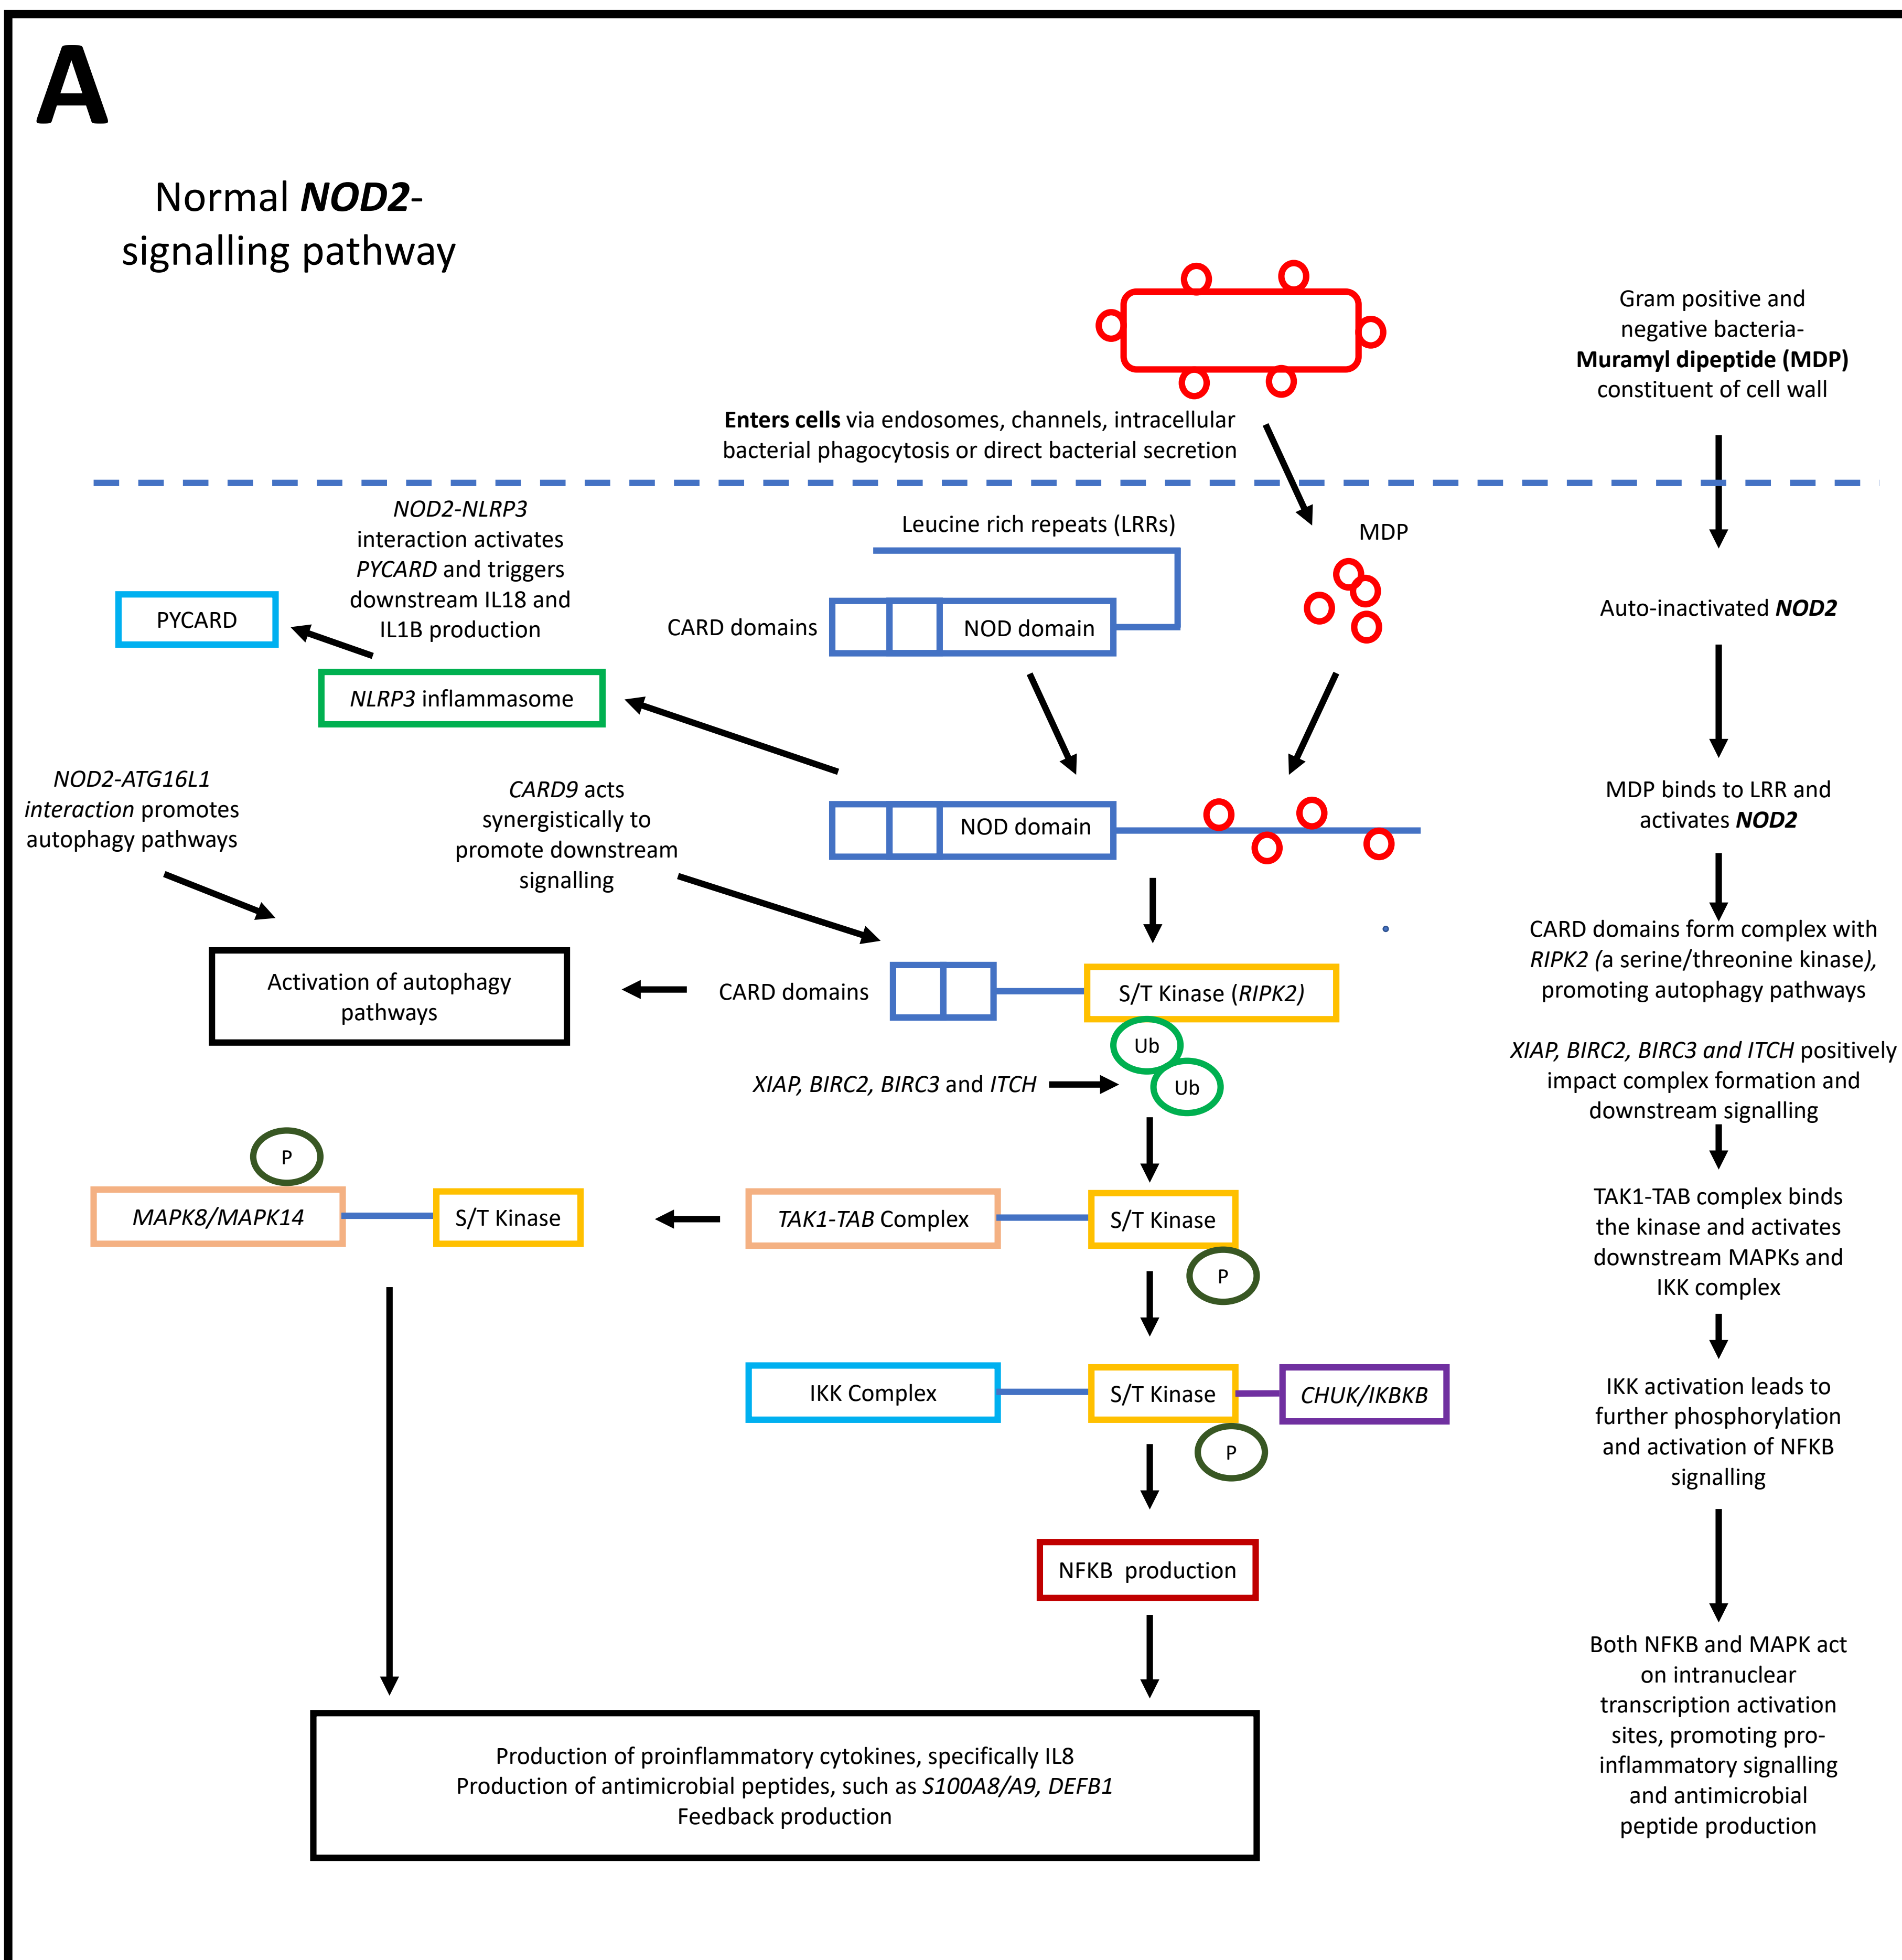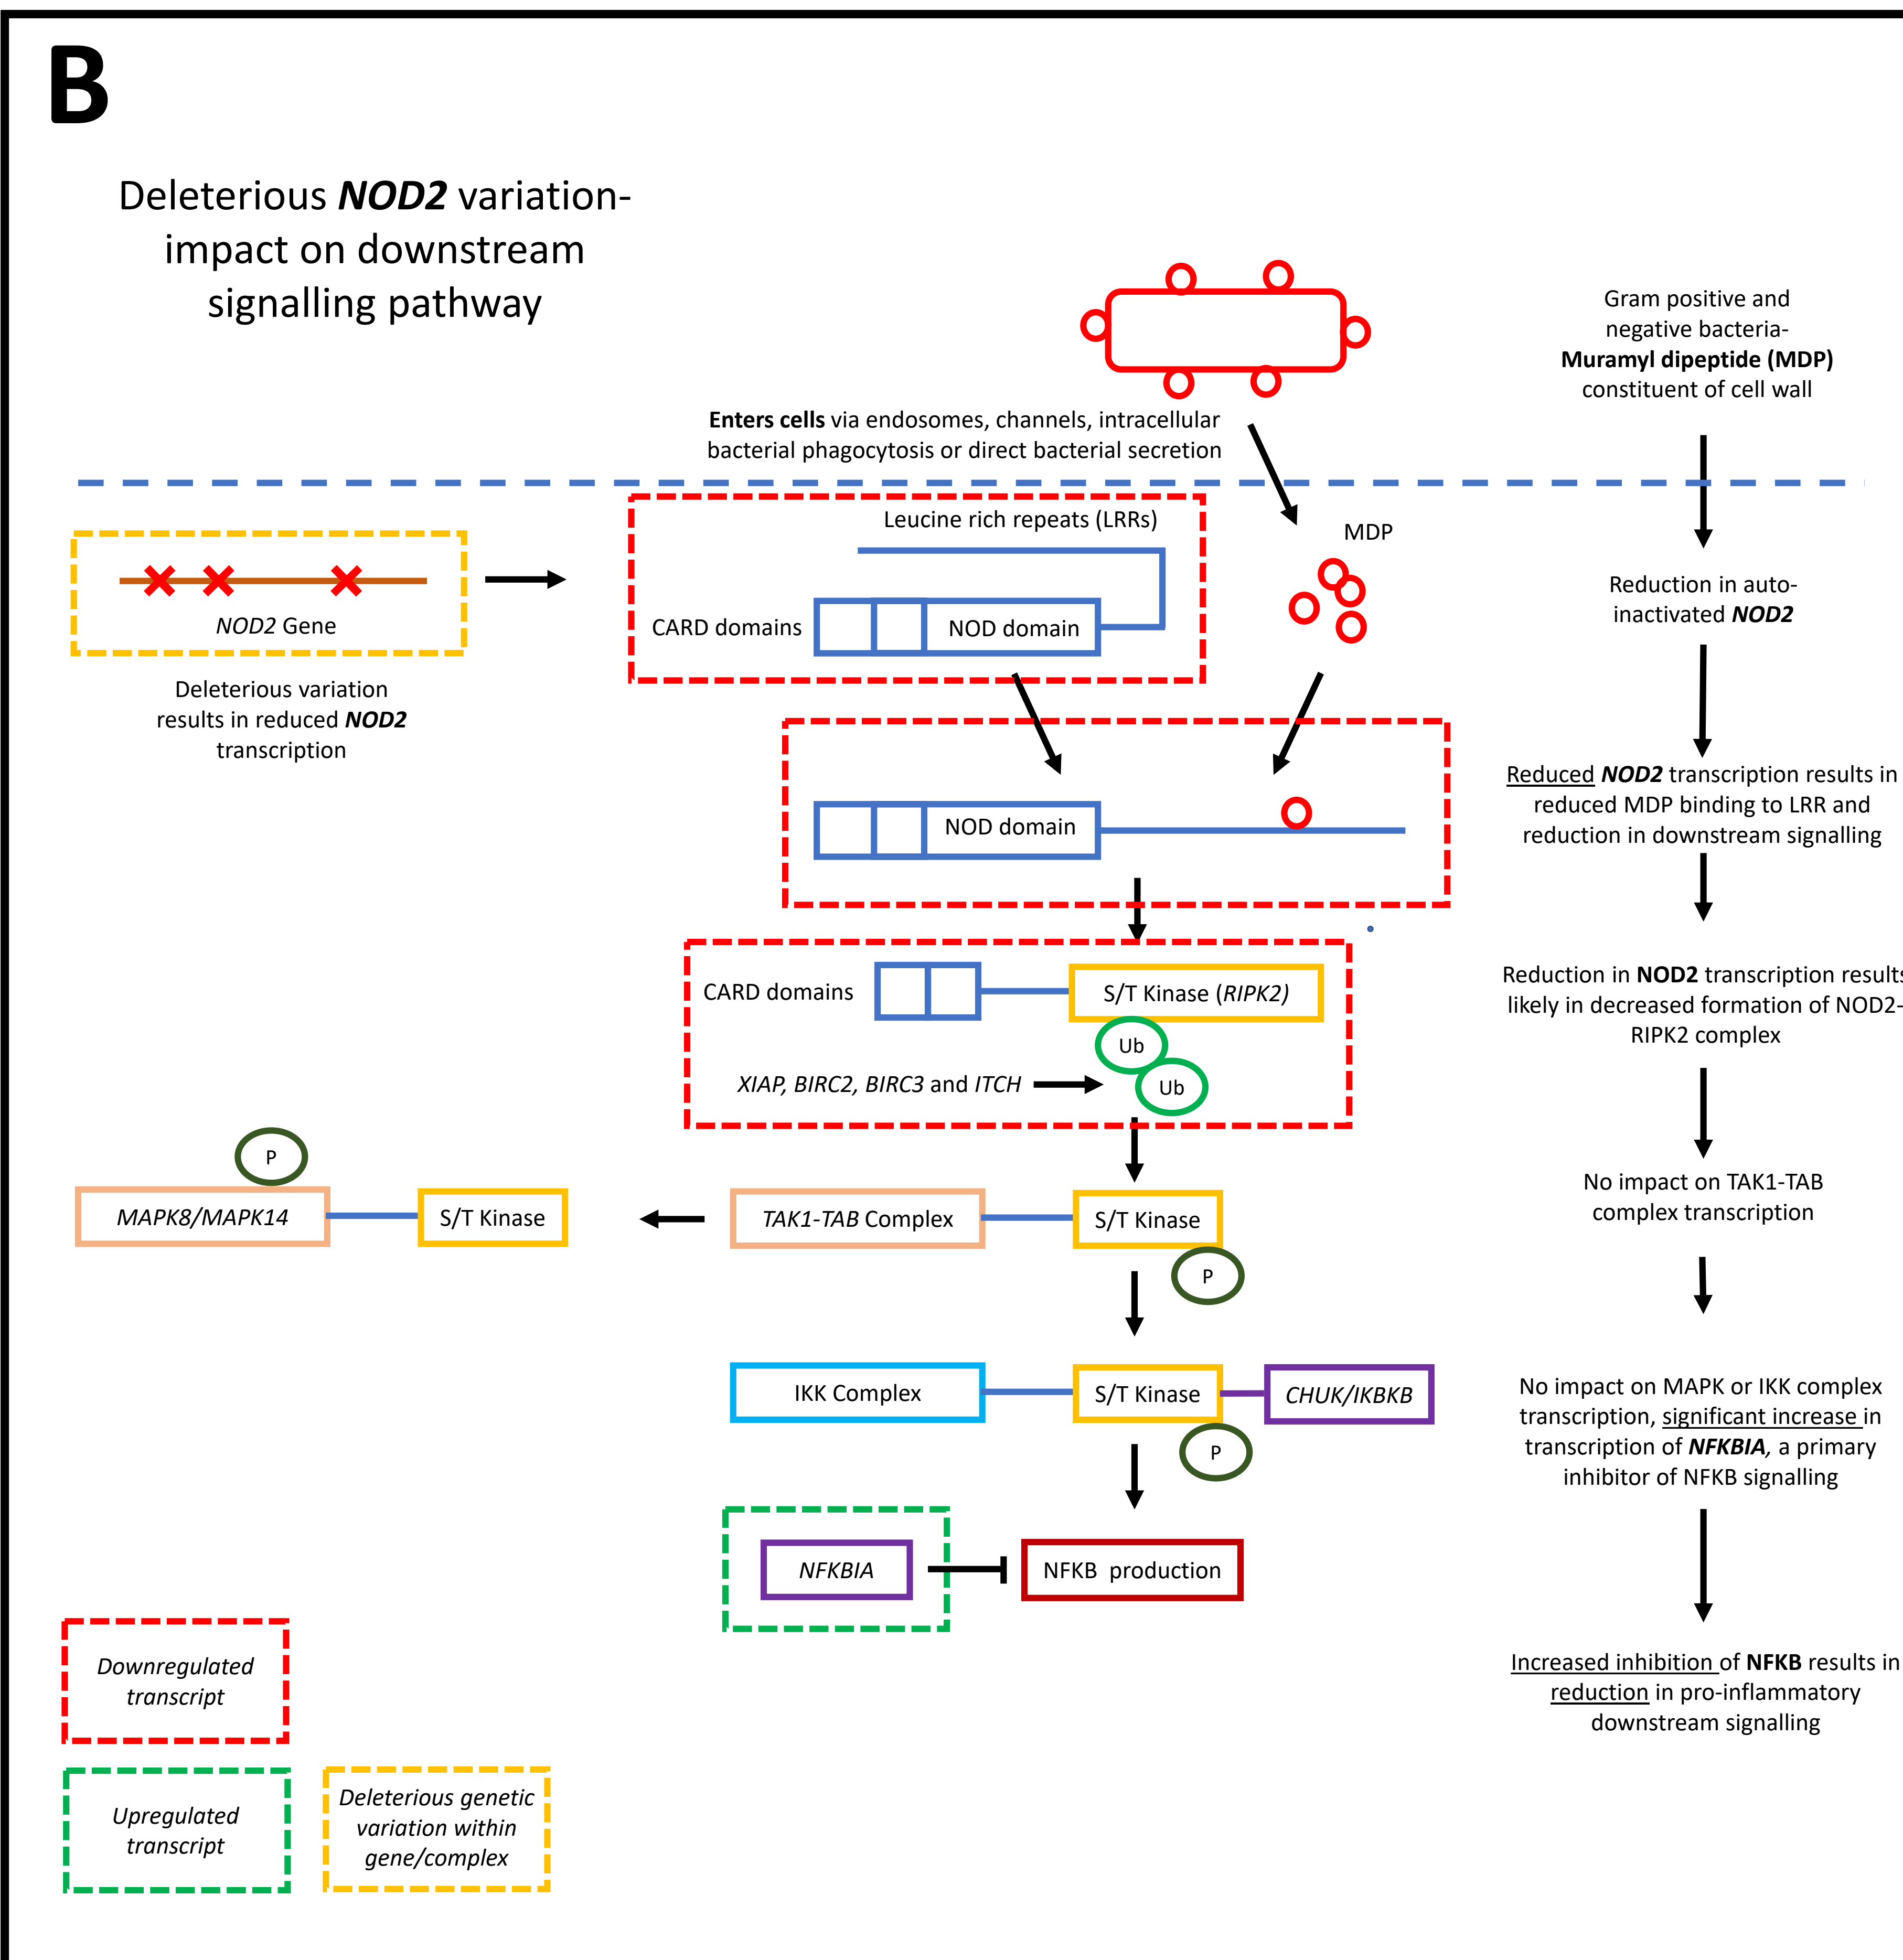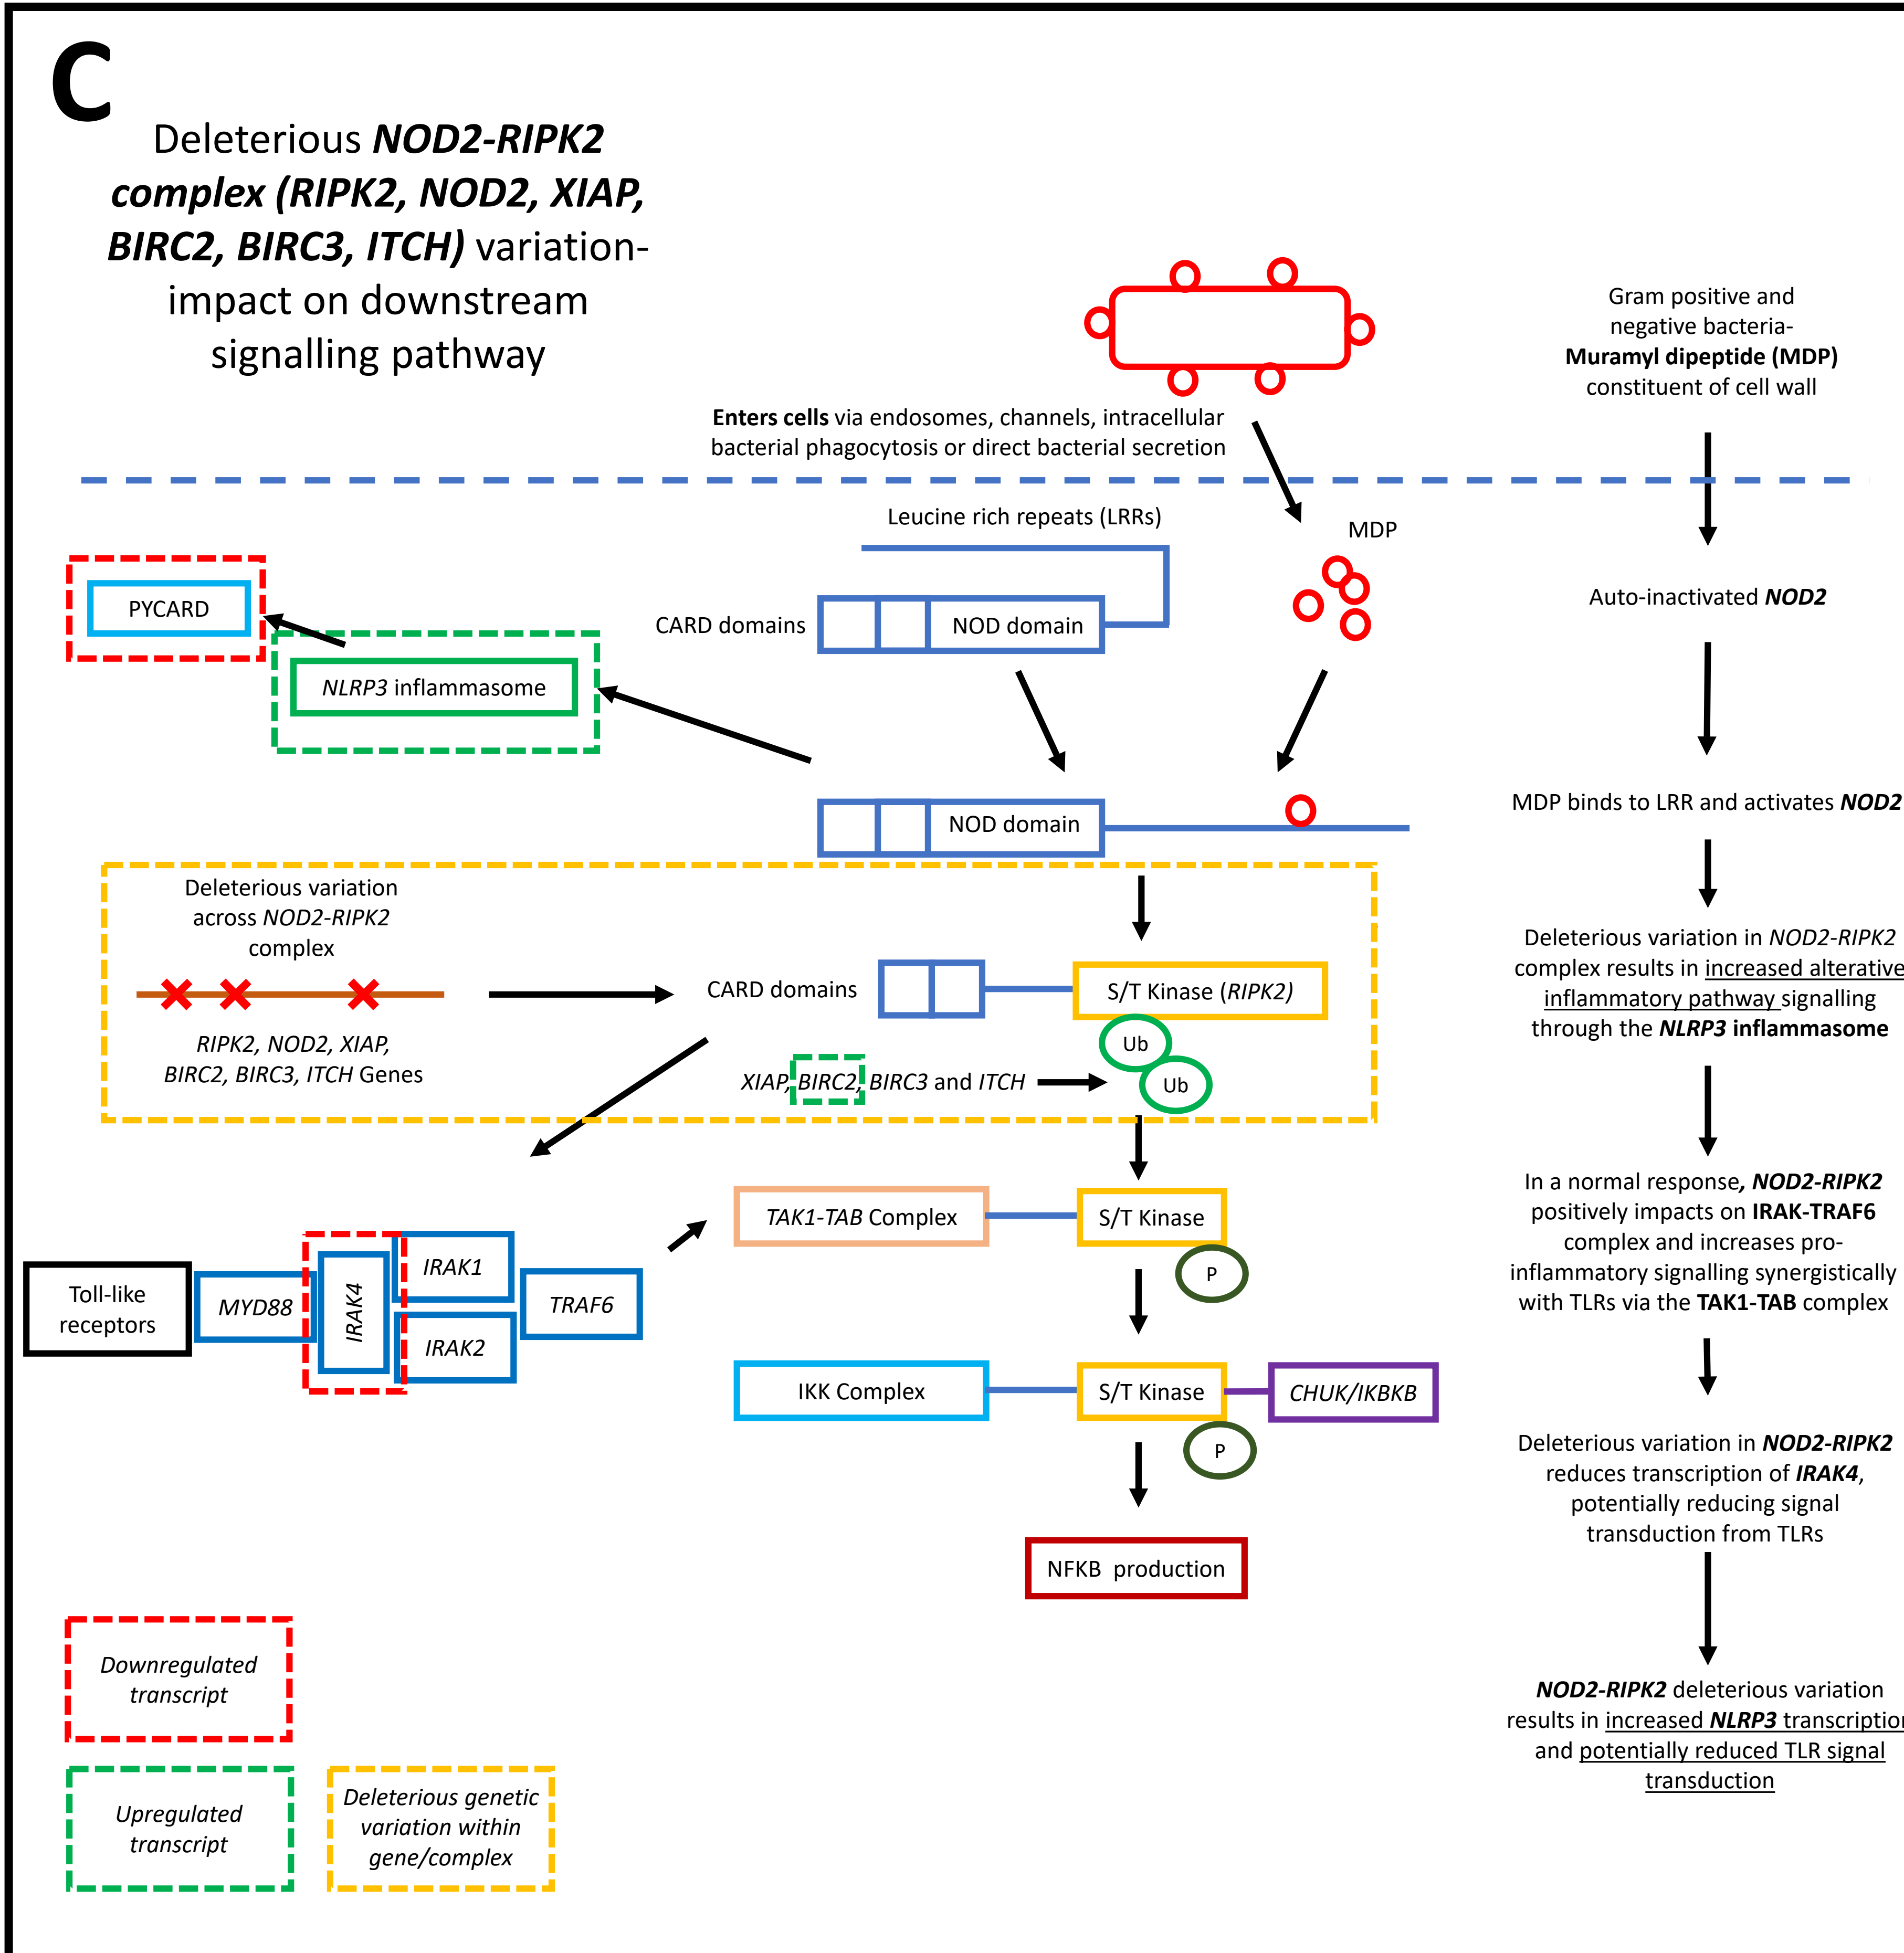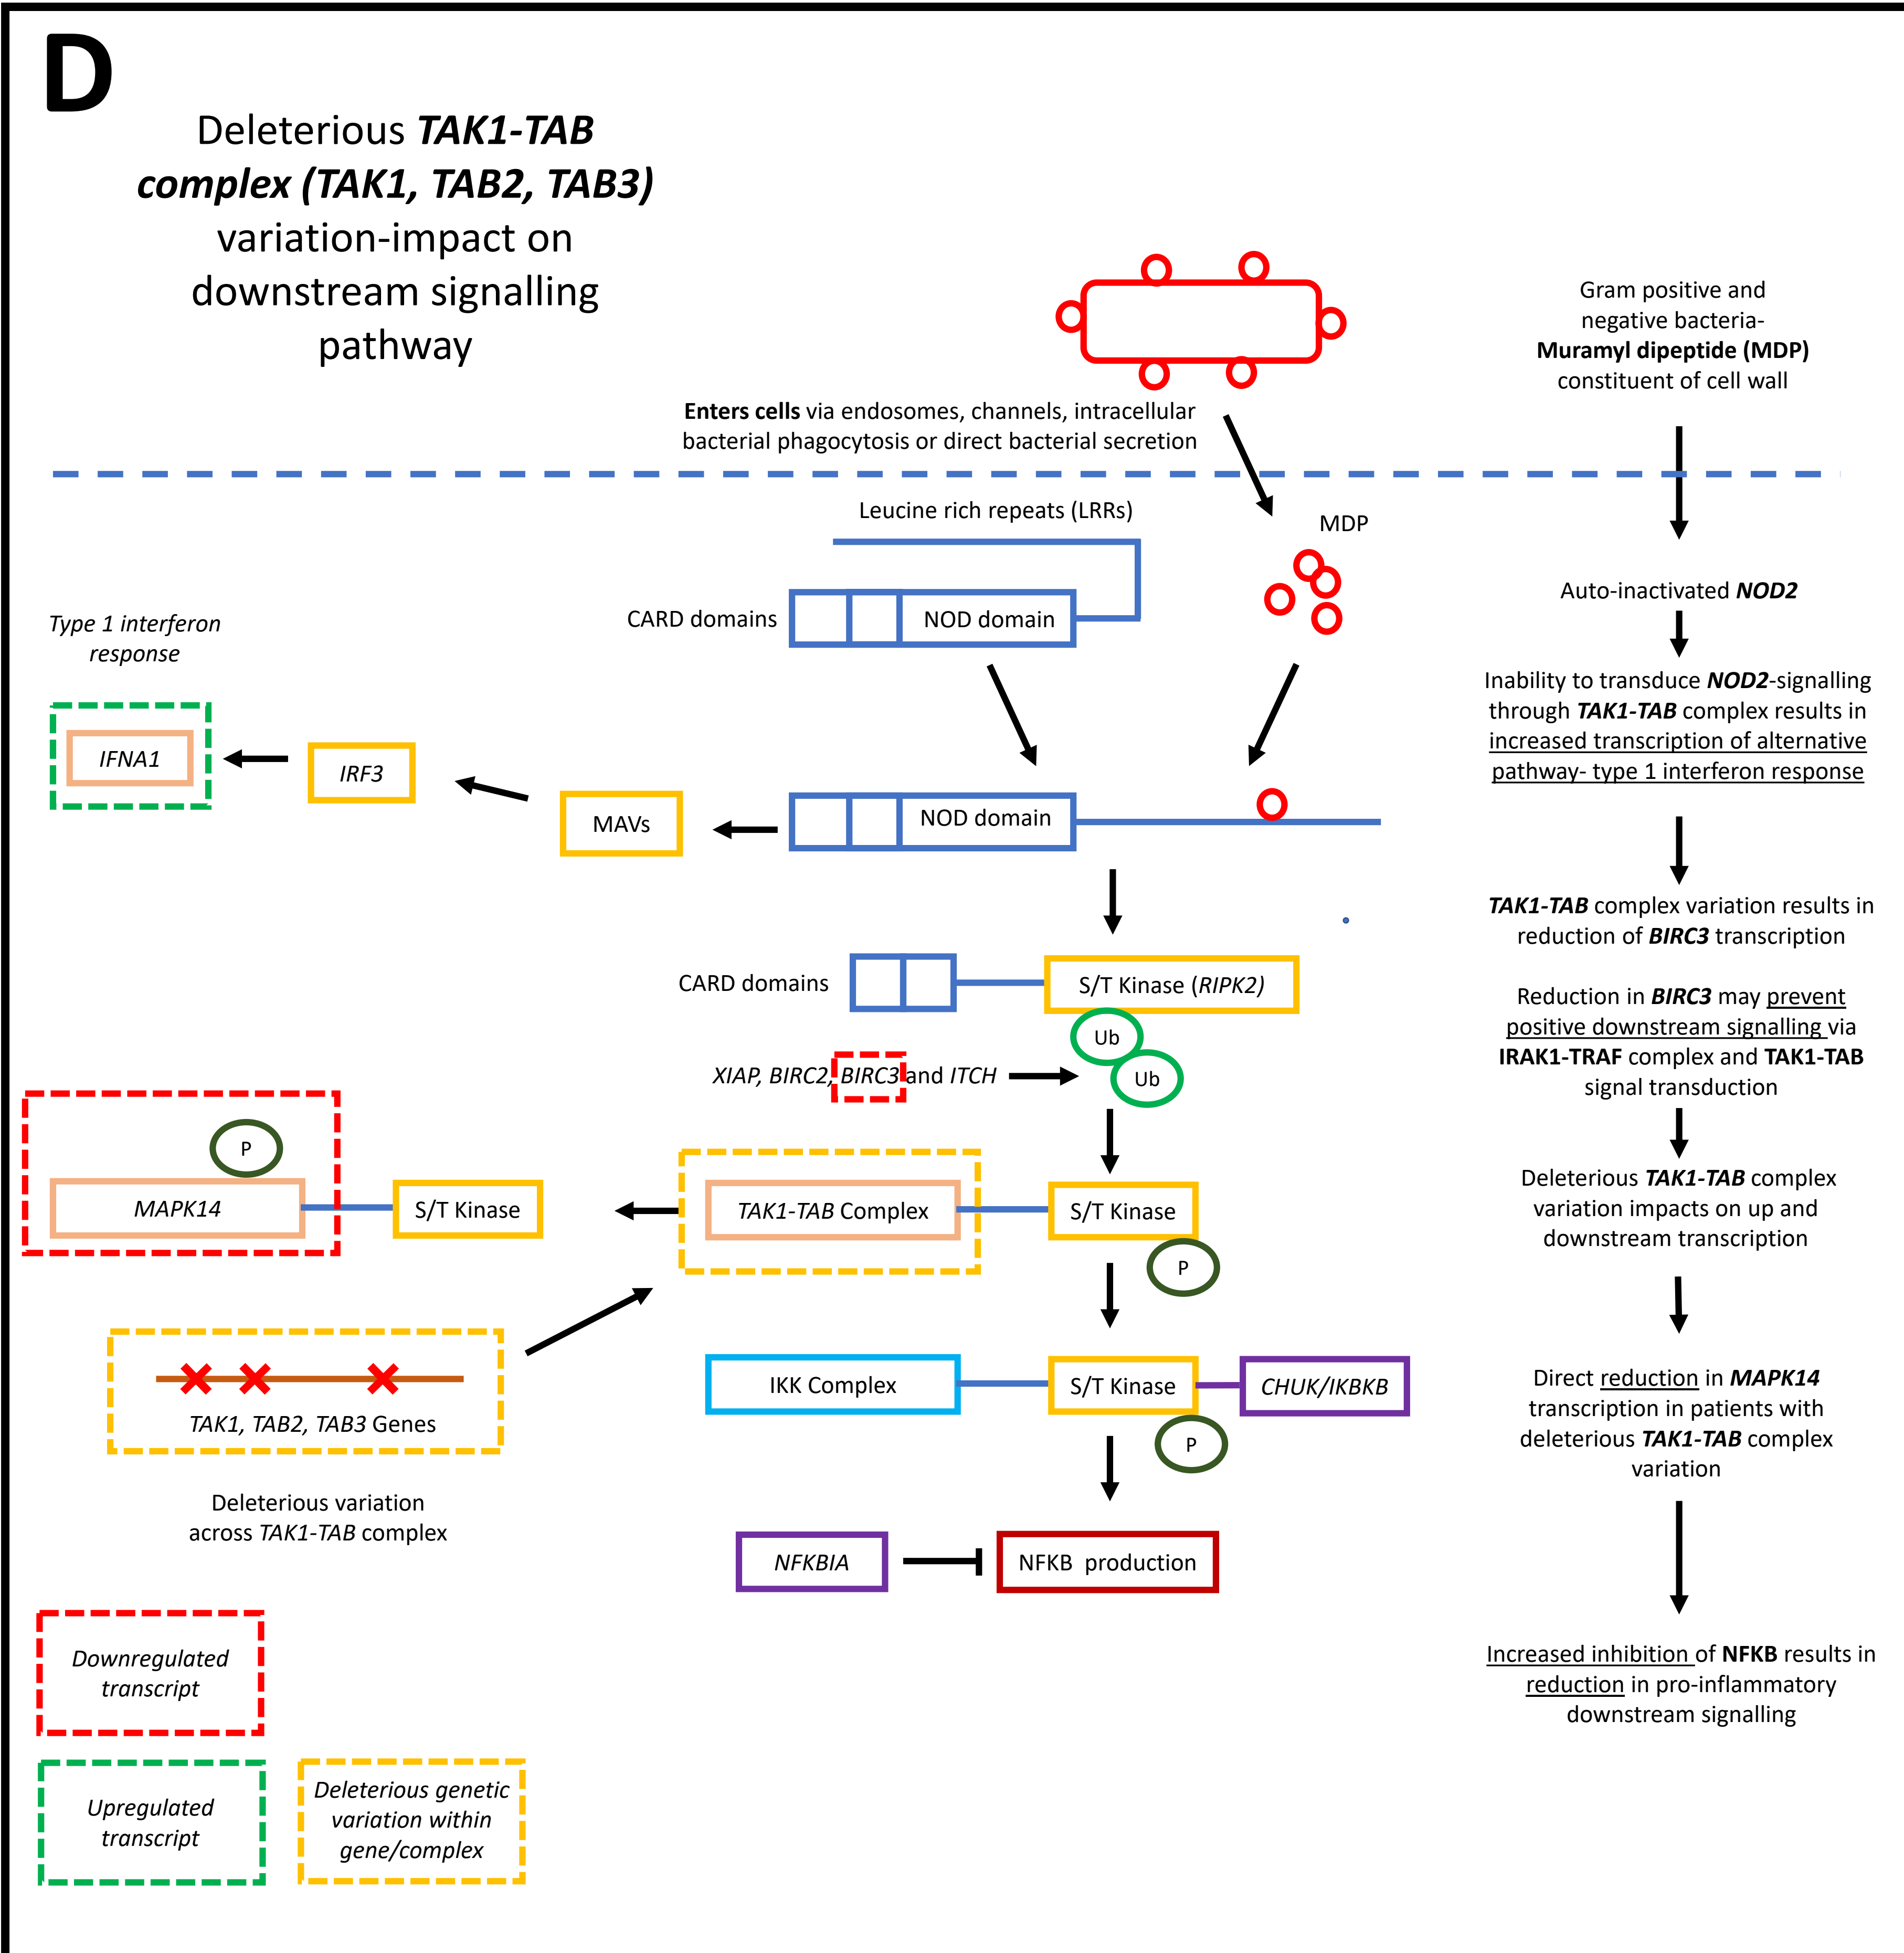

Supplement: izab318_suppl_supplementary_figure_1a-d.pdf [file izab318_suppl_supplementary_figure_1a-d.pdf]
